# Supplementary material
Source: Springer Nature journal article supplement (https://www.springermedizin.de/resource/supplementary/12879_2010_1621_MOESM3_ESM.pdf/9442916)

Acid-fast bacilli per 100 microscopy fields (geometric mean)

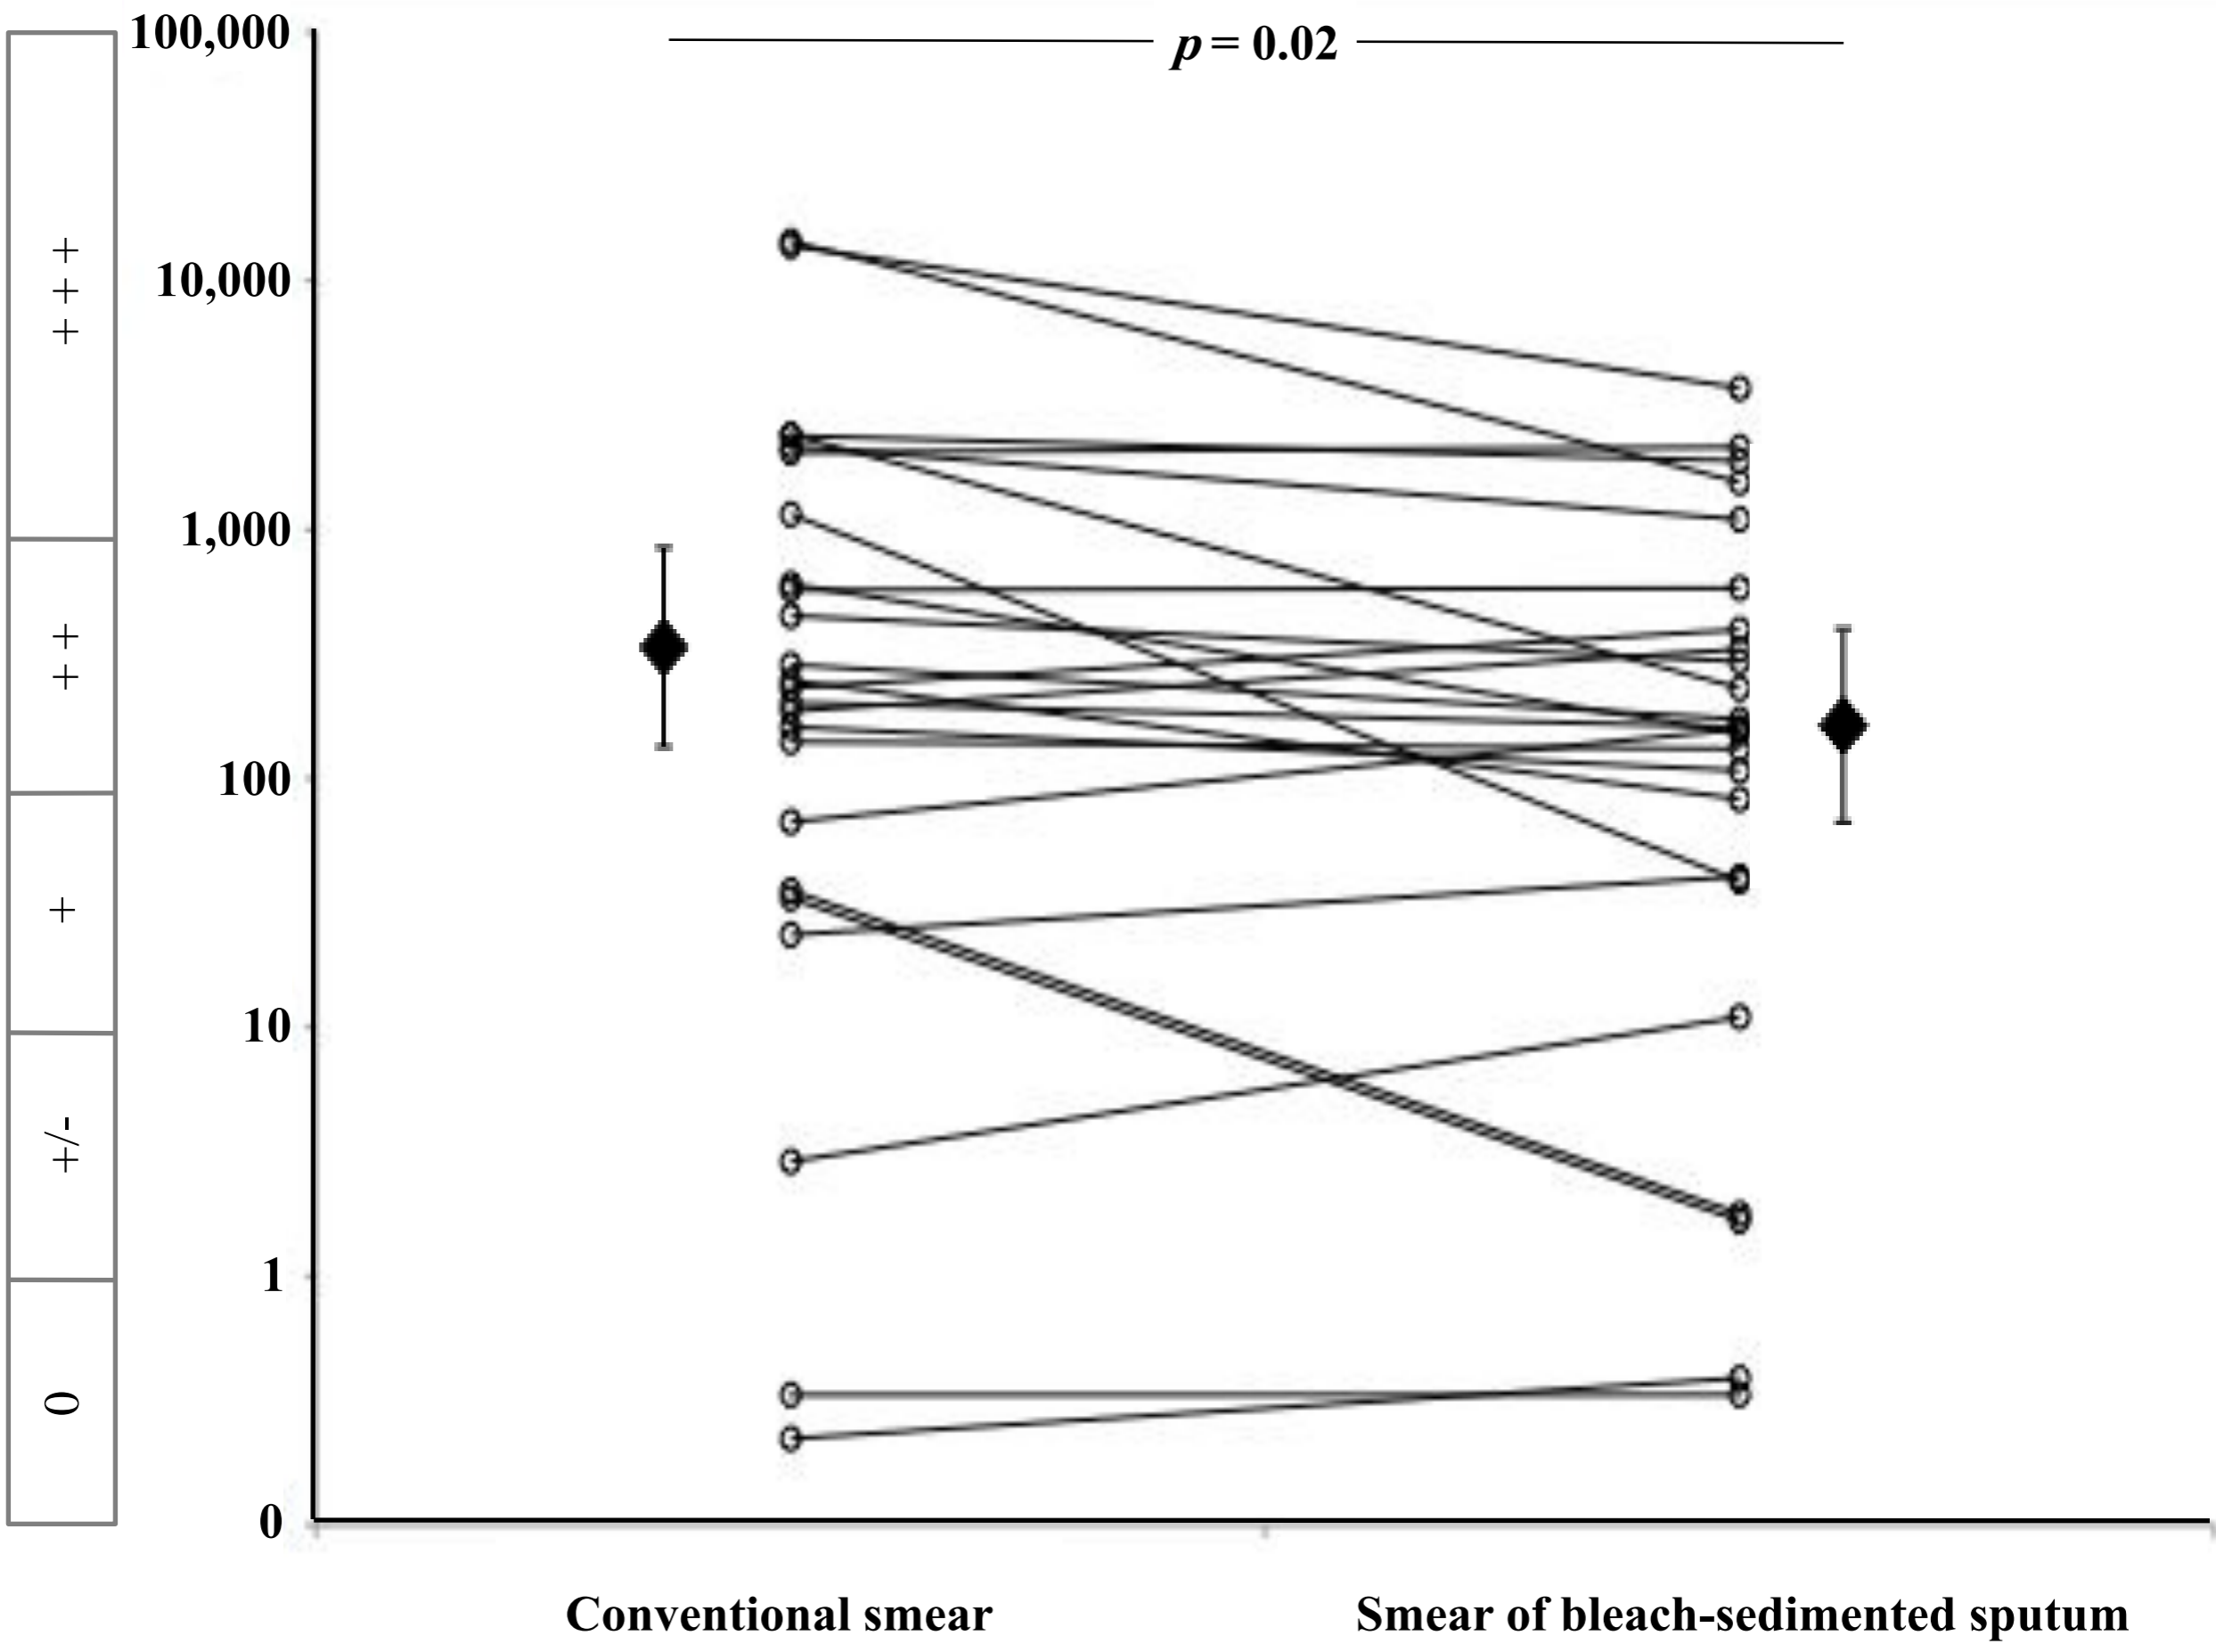

Supplement: MOESM3 [file 9442916]
